# Supplementary material for: Experimental and computational studies of sulfided NiMo supported on pillared clay: catalyst activation and guaiacol adsorption sites
Source: Royal Society of Chemistry journal article supplement (doi:10.1039/d2cp03987g), 2022-12-19
Supplement: d2cp03987g1.pdf [file d2cp03987g1.pdf]

**Electronic Supplementary Information for:  
“Experimental and Computational Studies of Sulfided NiMo/Al-PILC:  
Catalyst Activation and Guaiacol Adsorption Sites”**

F. Oemry,<sup>\*a</sup> I. B. Adilina,<sup>b</sup> W. T. Cahyanto,<sup>c</sup> N. Rinaldi,<sup>b</sup> F. Aulia,<sup>b</sup> A. Jackson,<sup>d</sup> S. F. Parker,<sup>e</sup>  
A. B. Kroner,<sup>f</sup> E. J. Shotton<sup>f</sup>

---

<sup>a</sup>Research Center for Quantum Physics, National Research and Innovation Agency, Kawasan Puspiptek Serpong, Tangerang Selatan, Banten 15314, Indonesia

Email: fere001@brin.go.id

<sup>b</sup>Research Center for Advanced Chemistry, National Research and Innovation Agency, Kawasan Puspiptek Serpong, Tangerang Selatan, Banten 15314, Indonesia

<sup>c</sup>Department of Physics, Universitas Jenderal Soedirman, Jl. dr. Soeparno 61, Purwokerto 53122, Indonesia

<sup>d</sup>Scientific Computing Department, STFC Rutherford Appleton Laboratory, Chilton, Didcot, Oxfordshire OX11 0QX, United Kingdom

<sup>e</sup>ISIS Neutron and Muon Source, STFC Rutherford Appleton Laboratory, Chilton, Didcot, Oxfordshire OX11 0QX, United Kingdom

<sup>f</sup>Diamond Light Source Ltd, Diamond House, Harwell Science and Innovation Campus, Didcot, Oxfordshire, OX11 0DE, United Kingdom

Table 1S: Mo K-edge EXAFS fitting parameters of NiMoPILC (*in situ*)

| No.                                                                                                      | Fitting model                  | Back scatterer                 | N           | R(Å)        | $\sigma^2$ (Å <sup>2</sup> )<br>x 10 <sup>-3</sup> | R-factor | Time-lapse | temp in °C    |
|----------------------------------------------------------------------------------------------------------|--------------------------------|--------------------------------|-------------|-------------|----------------------------------------------------|----------|------------|---------------|
| <b>Stage 4 (<math>\Delta k = 3 - 11 \text{ \AA}^{-1}</math>, H<sub>2</sub>S/H<sub>2</sub>/He gasses)</b> |                                |                                |             |             |                                                    |          |            |               |
| 1                                                                                                        | NiMoO <sub>4</sub>             | O                              | 2.4 ± 0.4   | 1.75 ± 0.04 | 0.31                                               | 0.0146   | 0:24:34    | 114.4 - 129.1 |
|                                                                                                          |                                | O                              | 3.6 ± 0.4   | 2.26 ± 0.04 | 18.85                                              |          |            |               |
|                                                                                                          |                                | Mo                             | 2.0 ± 0.1   | 3.29 ± 0.01 | 11.8                                               |          |            |               |
| 2                                                                                                        | NiMoO <sub>4</sub>             | O                              | 2.9 ± 0.4   | 1.75 ± 0.04 | 1.44                                               | 0.0123   | 0:27:38    | 147 - 164.6   |
|                                                                                                          |                                | O                              | 3.1 ± 0.4   | 2.25 ± 0.05 | 19.79                                              |          |            |               |
|                                                                                                          |                                | Mo                             | 2.0 ± 0.1   | 3.28 ± 0.01 | 13.85                                              |          |            |               |
| 3                                                                                                        | NiMoO <sub>4</sub>             | O                              | 2.8 ± 0.4   | 1.75 ± 0.04 | 1.27                                               | 0.0118   | 0:30:43    | 182.9 - 201.2 |
|                                                                                                          |                                | O                              | 3.2 ± 0.4   | 2.25 ± 0.05 | 19.69                                              |          |            |               |
|                                                                                                          |                                | Mo                             | 2.0 ± 0.1   | 3.28 ± 0.01 | 14.09                                              |          |            |               |
| 4                                                                                                        | NiMoO <sub>4</sub>             | O                              | 2.8 ± 0.4   | 1.75 ± 0.04 | 1.41                                               | 0.0111   | 0:33:47    | 219.6 - 237.8 |
|                                                                                                          |                                | O                              | 3.2 ± 0.4   | 2.24 ± 0.06 | 19.8                                               |          |            |               |
|                                                                                                          |                                | Mo                             | 2.0 ± 0.1   | 3.28 ± 0.02 | 14.44                                              |          |            |               |
| 5                                                                                                        | NiMoO <sub>4</sub>             | O                              | 2.7 ± 0.4   | 1.75 ± 0.04 | 1.56                                               | 0.0108   | 0:38:23    | 256.2 - 293.1 |
|                                                                                                          |                                | O                              | 3.3 ± 0.4   | 2.23 ± 0.07 | 19.54                                              |          |            |               |
|                                                                                                          |                                | Mo                             | 2.0 ± 0.1   | 3.27 ± 0.02 | 15.1                                               |          |            |               |
| 6                                                                                                        | NiMoO <sub>4</sub>             | O                              | 2.8 ± 0.4   | 1.75 ± 0.04 | 1.98                                               | 0.0105   | 0:39:55    | 308.8         |
|                                                                                                          |                                | O                              | 3.2 ± 0.4   | 2.22 ± 0.08 | 19.5                                               |          |            |               |
|                                                                                                          |                                | Mo                             | 2.0 ± 0.1   | 3.27 ± 0.03 | 15.81                                              |          |            |               |
| 7                                                                                                        | NiMoO <sub>4</sub>             | O                              | 2.9 ± 0.4   | 1.75 ± 0.04 | 2.27                                               | 0.0102   | 0:41:27    | 328.2         |
|                                                                                                          |                                | O                              | 3.2 ± 0.4   | 2.2 ± 0.09  | 19.21                                              |          |            |               |
|                                                                                                          |                                | Mo                             | 2.0 ± 0.1   | 3.26 ± 0.03 | 16.2                                               |          |            |               |
| 8                                                                                                        | NiMoO <sub>4</sub>             | O                              | 2.9 ± 0.3   | 1.75 ± 0.04 | 2.74                                               | 0.0115   | 0:43:00    | 345.9         |
|                                                                                                          |                                | O                              | 3.1 ± 0.3   | 2.18 ± 0.12 | 17.17                                              |          |            |               |
|                                                                                                          |                                | Mo                             | 2.0 ± 0.1   | 3.25 ± 0.05 | 17.33                                              |          |            |               |
| 9                                                                                                        | NiMoO <sub>4</sub>             | O                              | 2.9 ± 0.5   | 1.75 ± 0.04 | 3.65                                               | 0.0198   | 0:44:32    | 363.7         |
|                                                                                                          |                                | O                              | 3.2 ± 0.5   | 2.15 ± 0.15 | 14.29                                              |          |            |               |
|                                                                                                          |                                | Mo                             | 2.0 ± 0.2   | 3.22 ± 0.07 | 17.85                                              |          |            |               |
| 10                                                                                                       | NiMoO <sub>4</sub>             | O                              | 1.9 ± 0.2   | 1.76 ± 0.05 | 1.13                                               | 0.0057   | 0:46:04    | 379.7         |
|                                                                                                          |                                | Mo                             | 1.9 ± 0.2   | 3.27 ± 0.02 | 14.75                                              |          |            |               |
|                                                                                                          | Mo <sub>2</sub> S <sub>9</sub> | S                              | <b>1.8</b>  | 2.47 ± 0.05 | 13.15                                              |          |            |               |
|                                                                                                          | Mo                             | <b>0.6</b>                     | 2.77 ± 0.11 | 11.32       |                                                    |          |            |               |
| 11                                                                                                       | NiMoO <sub>4</sub>             | O                              | 1.5 ± 0.1   | 1.76 ± 0.04 | 0.39                                               | 0.0060   | 0:47:36    | 396.3         |
|                                                                                                          |                                | Mo                             | 1.5 ± 0.1   | 3.25 ± 0.04 | 12.93                                              |          |            |               |
|                                                                                                          | Mo <sub>2</sub> S <sub>9</sub> | S                              | <b>1.6</b>  | 2.45 ± 0.03 | 10.07                                              |          |            |               |
|                                                                                                          | Mo                             | <b>0.5</b>                     | 2.74 ± 0.08 | 10.77       |                                                    |          |            |               |
| <b>Stage 5 (<math>\Delta k = 3 - 11 \text{ \AA}^{-1}</math>, H<sub>2</sub>S/H<sub>2</sub>/He gasses)</b> |                                |                                |             |             |                                                    |          |            |               |
| 12                                                                                                       | NiMoO <sub>4</sub>             | O                              | 0.9 ± 0.3   | 1.75 ± 0.04 | 1.81                                               | 0.0209   | 0:56:49    | 418.1         |
|                                                                                                          |                                | Mo                             | 0.9 ± 0.3   | 3.22 ± 0.07 | 9.74                                               |          |            |               |
|                                                                                                          |                                | Mo <sub>2</sub> S <sub>9</sub> | S           | 2.9 ± 0.7   | 2.44 ± 0.03                                        |          |            |               |
| 13                                                                                                       | NiMoO <sub>4</sub>             | O                              | 0.6 ± 0.3   | 1.74 ± 0.03 | 0.87                                               | 0.0204   | 0:58:21    | 420           |
|                                                                                                          |                                | Mo                             | 0.6 ± 0.3   | 3.20 ± 0.09 | 7.10                                               |          |            |               |
|                                                                                                          |                                | Mo <sub>2</sub> S <sub>9</sub> | S           | 3.2 ± 0.9   | 2.43 ± 0.02                                        |          |            |               |
| <b>(<math>\Delta k = 3.1 - 11 \text{ \AA}^{-1}</math>, H<sub>2</sub>S/H<sub>2</sub>/He gasses)</b>       |                                |                                |             |             |                                                    |          |            |               |
| 14                                                                                                       | Mo-Oxy50                       | O                              | <b>0.4</b>  | 1.74 ± 0.05 | 0.07                                               | 0.0209   | 0:59:53    | 422.1         |
|                                                                                                          | Mo-Bare                        | S                              | 3.7 ± 0.6   | 2.44 ± 0.08 | 15.90                                              |          |            |               |
|                                                                                                          |                                | Mo                             | 3.7 ± 0.6   | 3.24 ± 0.09 | 20.08                                              |          |            |               |
|                                                                                                          |                                | S                              | 1.9 ± 0.3   | 3.83 ± 0.07 | 13.20                                              |          |            |               |

... continued

|                                                                                        |                                   |    |               |                 |       |        |         |               |
|----------------------------------------------------------------------------------------|-----------------------------------|----|---------------|-----------------|-------|--------|---------|---------------|
| 15                                                                                     | Mo-Oxy50<br>Mo-Bare               | O  | <b>0.3</b>    | $1.72 \pm 0.03$ | 0.62  | 0.0180 | 1:01:25 | 423.7         |
|                                                                                        |                                   | S  | $4.2 \pm 0.6$ | $2.43 \pm 0.07$ | 16.31 |        |         |               |
|                                                                                        |                                   | Mo | $4.2 \pm 0.6$ | $3.23 \pm 0.08$ | 20.17 |        |         |               |
|                                                                                        |                                   | S  | $2.1 \pm 0.3$ | $3.90 \pm 0.09$ | 13.86 |        |         |               |
| ( $\Delta k = 3 - 11 \text{ \AA}^{-1}$ , H <sub>2</sub> S/H <sub>2</sub> /He gasses)   |                                   |    |               |                 |       |        |         |               |
| 16                                                                                     | Mo-Oxy50<br>Bulk MoS <sub>2</sub> | O  | <b>0.4</b>    | $1.73 \pm 0.04$ | 1.78  | 0.0125 | 1:02:57 | 423.5         |
|                                                                                        |                                   | S  | $5.7 \pm 0.7$ | $2.44 \pm 0.03$ | 20.04 |        |         |               |
|                                                                                        |                                   | Mo | $5.7 \pm 0.7$ | $3.23 \pm 0.08$ | 21.46 |        |         |               |
|                                                                                        |                                   | S  | $5.7 \pm 0.7$ | $3.86 \pm 0.11$ | 25.10 |        |         |               |
| 17                                                                                     | Mo-Oxy50<br>Bulk MoS <sub>2</sub> | O  | <b>0.4</b>    | $1.72 \pm 0.02$ | 2.98  | 0.0135 | 1:04:29 | 418.8         |
|                                                                                        |                                   | S  | $6.0 \pm 0.7$ | $2.43 \pm 0.01$ | 19.92 |        |         |               |
|                                                                                        |                                   | Mo | $6.0 \pm 0.7$ | $3.22 \pm 0.06$ | 21.93 |        |         |               |
|                                                                                        |                                   | S  | $6.0 \pm 0.7$ | $3.85 \pm 0.12$ | 25.83 |        |         |               |
| 18                                                                                     | Mo-Oxy50<br>Bulk MoS <sub>2</sub> | O  | <b>0.5</b>    | $1.71 \pm 0.02$ | 6.47  | 0.0150 | 1:06:01 | 418.1         |
|                                                                                        |                                   | S  | $6.6 \pm 0.9$ | $2.43 \pm 0.02$ | 20.46 |        |         |               |
|                                                                                        |                                   | Mo | $6.6 \pm 0.9$ | $3.22 \pm 0.07$ | 21.95 |        |         |               |
|                                                                                        |                                   | S  | $6.6 \pm 0.9$ | $3.85 \pm 0.12$ | 26.59 |        |         |               |
| 19                                                                                     | Mo-Oxy50<br>Bulk MoS <sub>2</sub> | O  | <b>0.5</b>    | $1.71 \pm 0.01$ | 7.72  | 0.0161 | 1:07:34 | 420           |
|                                                                                        |                                   | S  | $6.6 \pm 0.9$ | $2.43 \pm 0.02$ | 20.08 |        |         |               |
|                                                                                        |                                   | Mo | $6.6 \pm 0.9$ | $3.21 \pm 0.06$ | 21.83 |        |         |               |
|                                                                                        |                                   | S  | $6.6 \pm 0.9$ | $3.85 \pm 0.12$ | 26.69 |        |         |               |
| 20                                                                                     | Mo-Oxy50<br>Bulk MoS <sub>2</sub> | O  | <b>0.4</b>    | $1.69 \pm 0.0$  | 5.97  | 0.0125 | 1:09:06 | 419.3         |
|                                                                                        |                                   | S  | $6.4 \pm 0.8$ | $2.43 \pm 0.01$ | 19.16 |        |         |               |
|                                                                                        |                                   | Mo | $6.4 \pm 0.8$ | $3.21 \pm 0.06$ | 21.48 |        |         |               |
|                                                                                        |                                   | S  | $6.4 \pm 0.8$ | $3.84 \pm 0.12$ | 26.34 |        |         |               |
| 21                                                                                     | Mo-Oxy50<br>Bulk MoS <sub>2</sub> | O  | <b>0.4</b>    | $1.68 \pm 0.02$ | 6.32  | 0.0135 | 1:13:42 | 420.5 - 421.6 |
|                                                                                        |                                   | S  | $6.3 \pm 0.8$ | $2.43 \pm 0.02$ | 18.85 |        |         |               |
|                                                                                        |                                   | Mo | $6.3 \pm 0.8$ | $3.21 \pm 0.06$ | 20.80 |        |         |               |
|                                                                                        |                                   | S  | $6.3 \pm 0.8$ | $3.84 \pm 0.13$ | 25.66 |        |         |               |
| ( $\Delta k = 3 - 10 \text{ \AA}^{-1}$ , H <sub>2</sub> S/H <sub>2</sub> /He gasses)   |                                   |    |               |                 |       |        |         |               |
| 22                                                                                     | Bulk MoS <sub>2</sub>             | S  | $5.4 \pm 0.9$ | $2.42 \pm 0.0$  | 15.78 | 0.0224 | 1:18:19 | 421.5 - 422.5 |
|                                                                                        |                                   | Mo | $5.4 \pm 0.9$ | $3.20 \pm 0.05$ | 18.91 |        |         |               |
|                                                                                        |                                   | S  | $5.4 \pm 0.9$ | $3.81 \pm 0.15$ | 24.53 |        |         |               |
| 23                                                                                     | Bulk MoS <sub>2</sub>             | S  | $5.3 \pm 0.8$ | $2.42 \pm 0.0$  | 15.14 | 0.0201 | 1:21:23 | 420.4 - 421.9 |
|                                                                                        |                                   | Mo | $5.3 \pm 0.8$ | $3.19 \pm 0.04$ | 18.69 |        |         |               |
|                                                                                        |                                   | S  | $5.3 \pm 0.8$ | $3.82 \pm 0.15$ | 24.41 |        |         |               |
| 24                                                                                     | Bulk MoS <sub>2</sub>             | S  | $5.5 \pm 0.8$ | $2.42 \pm 0.0$  | 15.15 | 0.0196 | 1:27:31 | 420.8 - 423.3 |
|                                                                                        |                                   | Mo | $5.5 \pm 0.8$ | $3.19 \pm 0.04$ | 18.28 |        |         |               |
|                                                                                        |                                   | S  | $5.5 \pm 0.8$ | $3.81 \pm 0.16$ | 24.54 |        |         |               |
| ( $\Delta k = 3 - 10.2 \text{ \AA}^{-1}$ , H <sub>2</sub> S/H <sub>2</sub> /He gasses) |                                   |    |               |                 |       |        |         |               |
| 25                                                                                     | Bulk MoS <sub>2</sub>             | S  | $5.3 \pm 0.8$ | $2.42 \pm 0.0$  | 14.34 | 0.0202 | 1:35:12 | 419.6 - 423.4 |
|                                                                                        |                                   | Mo | $5.3 \pm 0.8$ | $3.19 \pm 0.04$ | 17.81 |        |         |               |
|                                                                                        |                                   | S  | $5.3 \pm 0.8$ | $3.81 \pm 0.16$ | 24.20 |        |         |               |
|                                                                                        | Mo-S50                            | S  | $5.2 \pm 0.7$ | $2.42 \pm 0.0$  | 14.44 | 0.0192 |         |               |
|                                                                                        |                                   | Mo | $3.5 \pm 0.5$ | $3.19 \pm 0.04$ | 14.74 |        |         |               |
|                                                                                        |                                   | S  | $1.7 \pm 0.2$ | $3.77 \pm 0.28$ | 12.26 |        |         |               |
| 26                                                                                     | Bulk MoS <sub>2</sub>             | S  | $5.3 \pm 0.7$ | $2.42 \pm 0.0$  | 13.76 | 0.0197 | 1:45:57 | 419.9 - 423.7 |
|                                                                                        |                                   | Mo | $5.3 \pm 0.7$ | $3.19 \pm 0.04$ | 17.40 |        |         |               |
|                                                                                        |                                   | S  | $5.3 \pm 0.7$ | $3.81 \pm 0.16$ | 24.33 |        |         |               |
|                                                                                        | Mo-S50                            | S  | $5.2 \pm 0.7$ | $2.42 \pm 0.0$  | 13.86 | 0.0187 |         |               |
|                                                                                        |                                   | Mo | $3.5 \pm 0.5$ | $3.19 \pm 0.04$ | 14.35 |        |         |               |
|                                                                                        |                                   | S  | $1.7 \pm 0.2$ | $3.78 \pm 0.27$ | 12.63 |        |         |               |

|                                                                            |                       |    |            |             |       |        |         |               |
|----------------------------------------------------------------------------|-----------------------|----|------------|-------------|-------|--------|---------|---------------|
| 27                                                                         | Bulk MoS <sub>2</sub> | S  | 5.3 ± 0.7  | 2.42 ± 0.0  | 13.61 | 0.0187 | 1:49:01 | 423.6 - 423.7 |
| 92                                                                         |                       | Mo | 5.3 ± 0.7  | 3.19 ± 0.04 | 17.12 |        |         |               |
| 93                                                                         |                       | S  | 5.3 ± 0.7  | 3.81 ± 0.16 | 24.21 |        |         |               |
|                                                                            | Mo-S50                | S  | 5.2 ± 0.7  | 2.42 ± 0.0  | 13.74 | 0.0175 |         |               |
|                                                                            |                       | Mo | 3.5 ± 0.5  | 3.19 ± 0.04 | 14.05 |        |         |               |
|                                                                            |                       | S  | 1.7 ± 0.2  | 3.77 ± 0.28 | 12.29 |        |         |               |
| <b>Stage 6 (<math>\Delta k = 3.2 - 11 \text{ \AA}^{-1}</math>, He gas)</b> |                       |    |            |             |       |        |         |               |
| 28                                                                         | Mo-Bare               | S  | 4.5 ± 0.5  | 2.41 ± 0.05 | 11.71 | 0.0173 | 1:58:14 | 345.2 - 422   |
|                                                                            |                       | Mo | 4.5 ± 0.5  | 3.19 ± 0.04 | 15.53 |        |         |               |
|                                                                            |                       | S  | 2.5 ± 0.3  | 3.77 ± 0.13 | 13.17 |        |         |               |
|                                                                            |                       | S  | 2.5 ± 0.3  | 4.61 ± 0.02 | 16.40 |        |         |               |
|                                                                            |                       | S  | 10.0 ± 1.0 | 5.32 ± 0.29 | 28.50 |        |         |               |
|                                                                            | Mo-S50                | S  | 4.2 ± 0.5  | 2.41 ± 0.03 | 11.58 | 0.0178 |         |               |
|                                                                            |                       | Mo | 2.8 ± 0.3  | 3.18 ± 0.03 | 12.53 |        |         |               |
|                                                                            |                       | S  | 1.4 ± 0.2  | 3.75 ± 0.30 | 11.54 |        |         |               |
|                                                                            |                       | S  | 1.4 ± 0.2  | 4.64 ± 0.01 | 12.82 |        |         |               |
|                                                                            |                       | S  | 7.0 ± 0.8  | 5.34 ± 0.27 | 26.78 |        |         |               |
| 29                                                                         | Mo-Bare               | S  | 4.3 ± 0.5  | 2.41 ± 0.05 | 10.80 | 0.0182 | 2:07:27 | 238.4 - 325.4 |
|                                                                            |                       | Mo | 4.3 ± 0.5  | 3.17 ± 0.04 | 14.22 |        |         |               |
|                                                                            |                       | S  | 2.2 ± 0.2  | 3.77 ± 0.13 | 12.10 |        |         |               |
|                                                                            |                       | S  | 2.2 ± 0.2  | 4.63 ± 0.0  | 15.74 |        |         |               |
|                                                                            |                       | S  | 8.7 ± 0.9  | 5.32 ± 0.29 | 27.97 |        |         |               |
|                                                                            | Mo-S50                | S  | 4.1 ± 0.4  | 2.41 ± 0.03 | 10.70 | 0.0186 |         |               |
|                                                                            |                       | Mo | 2.7 ± 0.3  | 3.18 ± 0.03 | 11.31 |        |         |               |
|                                                                            |                       | S  | 1.4 ± 0.1  | 3.75 ± 0.30 | 10.73 |        |         |               |
|                                                                            |                       | S  | 1.4 ± 0.1  | 4.66 ± 0.01 | 11.51 |        |         |               |
|                                                                            |                       | S  | 6.8 ± 0.7  | 5.33 ± 0.27 | 26.54 |        |         |               |
| 30                                                                         | Mo-Bare               | S  | 4.3 ± 0.5  | 2.42 ± 0.05 | 9.85  | 0.0189 | 2:15:08 | 172.3 - 224   |
|                                                                            |                       | Mo | 4.3 ± 0.5  | 3.18 ± 0.12 | 12.96 |        |         |               |
|                                                                            |                       | S  | 2.1 ± 0.2  | 3.77 ± 0.13 | 11.65 |        |         |               |
|                                                                            |                       | S  | 2.1 ± 0.2  | 4.64 ± 0.01 | 14.49 |        |         |               |
|                                                                            |                       | S  | 8.5 ± 0.9  | 5.32 ± 0.29 | 27.47 |        |         |               |
|                                                                            | Mo-S50                | S  | 4.0 ± 0.4  | 2.41 ± 0.03 | 9.76  | 0.0194 |         |               |
|                                                                            |                       | Mo | 2.7 ± 0.3  | 3.18 ± 0.03 | 10.11 |        |         |               |
|                                                                            |                       | S  | 1.3 ± 0.1  | 3.74 ± 0.31 | 10.22 |        |         |               |
|                                                                            |                       | S  | 1.3 ± 0.1  | 4.67 ± 0.02 | 10.28 |        |         |               |
|                                                                            |                       | S  | 6.7 ± 0.7  | 5.33 ± 0.26 | 25.99 |        |         |               |
| <b>(<math>\Delta k = 3.3 - 11 \text{ \AA}^{-1}</math>, He gas)</b>         |                       |    |            |             |       |        |         |               |
| 31                                                                         | Mo-Bare               | S  | 4.3 ± 0.5  | 2.42 ± 0.05 | 9.53  | 0.0188 | 2:24:20 | 116.4 - 160.9 |
|                                                                            |                       | Mo | 4.3 ± 0.5  | 3.18 ± 0.11 | 12.30 |        |         |               |
|                                                                            |                       | S  | 2.2 ± 0.2  | 3.77 ± 0.13 | 11.56 |        |         |               |
|                                                                            |                       | S  | 2.2 ± 0.2  | 4.66 ± 0.03 | 14.63 |        |         |               |
|                                                                            |                       | S  | 8.6 ± 1.0  | 5.30 ± 0.27 | 26.80 |        |         |               |
| <b>(<math>\Delta k = 3.2 - 11 \text{ \AA}^{-1}</math>, He gas)</b>         |                       |    |            |             |       |        |         |               |
|                                                                            | Mo-S50                | S  | 4.0 ± 0.5  | 2.41 ± 0.03 | 9.25  | 0.0209 |         |               |
|                                                                            |                       | Mo | 2.7 ± 0.3  | 3.18 ± 0.03 | 9.38  |        |         |               |
|                                                                            |                       | S  | 1.3 ± 0.1  | 3.74 ± 0.31 | 10.03 |        |         |               |
|                                                                            |                       | S  | 1.3 ± 0.1  | 4.68 ± 0.03 | 9.39  |        |         |               |
|                                                                            |                       | S  | 6.7 ± 0.8  | 5.32 ± 0.26 | 25.79 |        |         |               |

... continued

|    |         |                                           |           |             |       |        |         |             |  |
|----|---------|-------------------------------------------|-----------|-------------|-------|--------|---------|-------------|--|
| 32 | Mo-Bare | S                                         | 4.3 ± 0.5 | 2.42 ± 0.05 | 9.21  | 0.0191 | 2:33:33 | 79 - 109.2  |  |
|    |         | Mo                                        | 4.3 ± 0.5 | 3.18 ± 0.11 | 11.77 |        |         |             |  |
|    |         | S                                         | 2.2 ± 0.3 | 3.77 ± 0.13 | 11.37 |        |         |             |  |
|    |         | S                                         | 2.2 ± 0.3 | 4.67 ± 0.03 | 13.45 |        |         |             |  |
|    |         | S                                         | 8.7 ± 1.0 | 5.29 ± 0.26 | 26.20 |        |         |             |  |
|    | Mo-S50  | (Δk= 3.4 - 11.5 Å <sup>-1</sup> , He gas) |           |             |       |        | 0.0248  |             |  |
|    |         | S                                         | 4.1 ± 0.6 | 2.41 ± 0.04 | 8.88  |        |         |             |  |
|    |         | Mo                                        | 2.7 ± 0.4 | 3.18 ± 0.03 | 8.46  |        |         |             |  |
|    |         | S                                         | 1.4 ± 0.2 | 3.73 ± 0.36 | 10.09 |        |         |             |  |
|    |         | S                                         | 1.4 ± 0.2 | 4.70 ± 0.05 | 8.66  |        |         |             |  |
| 33 | Mo-Bare | S                                         | 4.4 ± 0.5 | 2.42 ± 0.06 | 9.05  | 0.0192 | 2:41:14 | 58.7 - 74   |  |
|    |         | Mo                                        | 4.4 ± 0.5 | 3.18 ± 0.11 | 11.47 |        |         |             |  |
|    |         | S                                         | 2.2 ± 0.3 | 3.77 ± 0.14 | 11.28 |        |         |             |  |
|    |         | S                                         | 2.2 ± 0.3 | 4.67 ± 0.04 | 12.70 |        |         |             |  |
|    |         | S                                         | 8.7 ± 1.0 | 5.29 ± 0.26 | 26.04 |        |         |             |  |
|    | Mo-S50  | (Δk= 3.4 - 11 Å <sup>-1</sup> , He gas)   |           |             |       |        | 0.0176  |             |  |
|    |         | S                                         | 4.2 ± 0.5 | 2.42 ± 0.04 | 9.22  |        |         |             |  |
|    |         | Mo                                        | 2.8 ± 0.3 | 3.17 ± 0.03 | 8.85  |        |         |             |  |
|    |         | S                                         | 1.4 ± 0.2 | 3.74 ± 0.31 | 10.51 |        |         |             |  |
|    |         | S                                         | 1.4 ± 0.2 | 4.70 ± 0.05 | 9.03  |        |         |             |  |
| 34 | Mo-Bare | S                                         | 4.4 ± 0.5 | 2.42 ± 0.06 | 8.89  | 0.0194 | 3:01:12 | 31.6 - 55.4 |  |
|    |         | Mo                                        | 4.4 ± 0.5 | 3.18 ± 0.11 | 11.17 |        |         |             |  |
|    |         | S                                         | 2.2 ± 0.3 | 3.76 ± 0.13 | 11.18 |        |         |             |  |
|    |         | S                                         | 2.2 ± 0.3 | 4.68 ± 0.05 | 12.52 |        |         |             |  |
|    |         | S                                         | 8.7 ± 1.0 | 5.28 ± 0.25 | 25.49 |        |         |             |  |
|    | Mo-S50  | (Δk= 3.3 - 11 Å <sup>-1</sup> , He gas)   |           |             |       |        | 0.0191  |             |  |
|    |         | S                                         | 4.2 ± 0.5 | 2.42 ± 0.04 | 8.88  |        |         |             |  |
|    |         | Mo                                        | 2.8 ± 0.3 | 3.18 ± 0.03 | 8.46  |        |         |             |  |
|    |         | S                                         | 1.4 ± 0.2 | 3.73 ± 0.36 | 10.09 |        |         |             |  |
|    |         | S                                         | 1.4 ± 0.2 | 4.70 ± 0.05 | 8.66  |        |         |             |  |
|    |         | S                                         | 7.0 ± 0.8 | 5.29 ± 0.23 | 23.89 |        |         |             |  |

At stage 6, Hamilton test (ref. 58) was applied by imposing k- and R-ranges on the same values in order to test two different models on the same EXAFS data independently and both of them give almost similar results (same fitting parameters)

Table 2S: Ni K-edge EXAFS fitting parameters of NiMoPILC (*in situ*)

| No. | Fitting model      | Back scatterer                                                                    | N         | R(Å)        | σ <sup>2</sup> (Å <sup>2</sup> ) x 10 <sup>-3</sup> | R-factor | Time-lapse | temp in °C    |
|-----|--------------------|-----------------------------------------------------------------------------------|-----------|-------------|-----------------------------------------------------|----------|------------|---------------|
| 1   | NiMoO <sub>4</sub> | Stage 4 (Δk= 3 - 11 Å <sup>-1</sup> , H <sub>2</sub> S/H <sub>2</sub> /He gasses) |           |             |                                                     |          |            |               |
|     |                    | O                                                                                 | 5.2 ± 0.5 | 2.03 ± 0.02 | 7.56                                                | 0.008    | 1:13:11    | 127.8 - 159.5 |
|     |                    | Ni                                                                                | 1.7 ± 0.2 | 3.02 ± 0.05 | 19.98                                               |          |            |               |
|     |                    | Mo                                                                                | 1.7 ± 0.2 | 3.19 ± 0.05 | 19.46                                               |          |            |               |
| Mo  | 1.7 ± 0.2          | 3.78 ± 0.0                                                                        | 11.94     |             |                                                     |          |            |               |
| 2   | NiMoO <sub>4</sub> | O                                                                                 | 5.2 ± 0.5 | 2.02 ± 0.02 | 7.95                                                | 0.0112   | 1:15:48    | 176.3 - 193.3 |
|     |                    | Ni                                                                                | 1.7 ± 0.2 | 3.01 ± 0.04 | 20.55                                               |          |            |               |
|     |                    | Mo                                                                                | 1.7 ± 0.2 | 3.20 ± 0.06 | 19.61                                               |          |            |               |
|     |                    | Mo                                                                                | 1.7 ± 0.2 | 3.77 ± 0.07 | 11                                                  |          |            |               |

... continued

|                                                                                            |                                       |    |            |             |       |        |         |               |
|--------------------------------------------------------------------------------------------|---------------------------------------|----|------------|-------------|-------|--------|---------|---------------|
| 3                                                                                          | NiMoO <sub>4</sub>                    | O  | 5.1 ± 0.5  | 2.02 ± 0.02 | 8.43  | 0.0086 | 1:23:38 | 210.1 – 294.7 |
|                                                                                            |                                       | Ni | 1.7 ± 0.2  | 3.01 ± 0.05 | 19.01 |        |         |               |
|                                                                                            |                                       | Mo | 1.7 ± 0.2  | 3.19 ± 0.05 | 19.65 |        |         |               |
|                                                                                            |                                       | Mo | 1.7 ± 0.2  | 3.78 ± 0.07 | 14.52 |        |         |               |
| 4                                                                                          | NiMoO <sub>4</sub>                    | O  | 5.2 ± 0.6  | 2.01 ± 0.01 | 9.93  | 0.0118 | 1:26:14 | 311.6 – 328.3 |
|                                                                                            |                                       | Ni | 1.7 ± 0.2  | 3.02 ± 0.05 | 25.04 |        |         |               |
|                                                                                            |                                       | Mo | 1.7 ± 0.2  | 3.21 ± 0.07 | 18.95 |        |         |               |
|                                                                                            |                                       | Mo | 1.7 ± 0.2  | 3.71 ± 0.01 | 15.38 |        |         |               |
| (Δk= 3 – 11.6 Å <sup>-1</sup> , H <sub>2</sub> S/H <sub>2</sub> /He gasses)                |                                       |    |            |             |       |        |         |               |
| 5                                                                                          | NiMoO <sub>4</sub>                    | O  | 5.4 ± 0.7  | 2.01 ± 0.0  | 9.89  | 0.0169 | 1:27:33 | 345.1         |
|                                                                                            |                                       | Ni | 1.8 ± 0.3  | 3.02 ± 0.05 | 25.79 |        |         |               |
|                                                                                            |                                       | Mo | 1.8 ± 0.3  | 3.18 ± 0.04 | 14.83 |        |         |               |
|                                                                                            |                                       | Mo | 1.8 ± 0.3  | 3.74 ± 0.04 | 20.03 |        |         |               |
| 6                                                                                          | NiMoO <sub>4</sub>                    | O  | 5.6 ± 0.9  | 1.99 ± 0.01 | 11.34 | 0.02   | 1:28:51 | 362           |
|                                                                                            |                                       | Ni | 1.9 ± 0.3  | 3.05 ± 0.08 | 27.62 |        |         |               |
|                                                                                            |                                       | Mo | 1.9 ± 0.3  | 3.20 ± 0.06 | 17.94 |        |         |               |
|                                                                                            |                                       | Mo | 1.9 ± 0.3  | 3.69 ± 0.01 | 16.48 |        |         |               |
| (Δk= 3 – 12 Å <sup>-1</sup> , H <sub>2</sub> S/H <sub>2</sub> /He gasses)                  |                                       |    |            |             |       |        |         |               |
| 7                                                                                          | NiMoO <sub>4</sub>                    | O  | 5.8 ± 0.5  | 2.01 ± 0.01 | 11.62 | 0.0096 | 1:30:09 | 378.9         |
|                                                                                            |                                       | Ni | 1.9 ± 0.2  | 3.01 ± 0.05 | 26.17 |        |         |               |
|                                                                                            |                                       | Mo | 1.9 ± 0.2  | 3.18 ± 0.04 | 19.66 |        |         |               |
|                                                                                            |                                       | Mo | 1.9 ± 0.2  | 3.77 ± 0.06 | 14.83 |        |         |               |
| 8                                                                                          | NiMoO <sub>4</sub>                    | O  | 3.5 ± 0.4  | 2.02 ± 0.02 | 6.26  | 0.0197 | 1:31:28 | 395.4         |
|                                                                                            |                                       | Ni | 1.2 ± 0.1  | 3.03 ± 0.06 | 21.3  |        |         |               |
|                                                                                            |                                       | Mo | 1.2 ± 0.1  | 3.23 ± 0.09 | 11.33 |        |         |               |
|                                                                                            |                                       | Mo | 1.2 ± 0.1  | 3.71 ± 0.01 | 15.12 |        |         |               |
| <b>Stage 5</b> (Δk= 2.8 – 10 Å <sup>-1</sup> , H <sub>2</sub> S/H <sub>2</sub> /He gasses) |                                       |    |            |             |       |        |         |               |
| 9                                                                                          | NiMoO <sub>4</sub>                    | O  | <b>4.8</b> | 1.99 ± 0.01 | 11.18 | 0.0199 | 1:34:51 | 414.2         |
|                                                                                            |                                       | Ni | <b>1.6</b> | 3.0 ± 0.03  | 16.69 |        |         |               |
|                                                                                            |                                       | Mo | <b>1.6</b> | 3.16 ± 0.02 | 17.64 |        |         |               |
| (Δk= 3 – 11 Å <sup>-1</sup> , H <sub>2</sub> S/H <sub>2</sub> /He gasses)                  |                                       |    |            |             |       |        |         |               |
| 10                                                                                         | NiO<br>Ni <sub>3</sub> S <sub>2</sub> | O  | <b>2</b>   | 1.99 ± 0.1  | 3.79  | 0.0197 | 1:36:41 | 418.1         |
|                                                                                            |                                       | S  | <b>1.2</b> | 2.3 ± 0.05  | 23.06 |        |         |               |
|                                                                                            |                                       | Ni | <b>1.2</b> | 2.51 ± 0.01 | 12.18 |        |         |               |
| (Δk= 3 – 12 Å <sup>-1</sup> , H <sub>2</sub> S/H <sub>2</sub> /He gasses)                  |                                       |    |            |             |       |        |         |               |
| 11                                                                                         | NiO<br>Ni <sub>3</sub> S <sub>2</sub> | O  | <b>4.5</b> | 2.07 ± 0.02 | 12.58 | 0.0111 | 1:39:18 | 419.5         |
|                                                                                            |                                       | S  | <b>1.6</b> | 2.17 ± 0.08 | 10.50 |        |         |               |
|                                                                                            |                                       | Ni | <b>1.6</b> | 2.55 ± 0.05 | 19.91 |        |         |               |
|                                                                                            |                                       | S  | <b>1.6</b> | 3.62 ± 0.06 | 12.72 |        |         |               |
| (Δk= 3 – 10.8 Å <sup>-1</sup> , H <sub>2</sub> S/H <sub>2</sub> /He gasses)                |                                       |    |            |             |       |        |         |               |
| 12                                                                                         | NiO<br>Ni <sub>3</sub> S <sub>2</sub> | O  | <b>5.5</b> | 2.05 ± 0.04 | 14.76 | 0.0183 | 1:41:15 | 421.9         |
|                                                                                            |                                       | S  | <b>2</b>   | 2.16 ± 0.09 | 12.5  |        |         |               |
|                                                                                            |                                       | Ni | <b>2</b>   | 2.54 ± 0.04 | 22.65 |        |         |               |
|                                                                                            |                                       | S  | <b>2</b>   | 3.58 ± 0.09 | 14.21 |        |         |               |
| (Δk= 3 – 11 Å <sup>-1</sup> , H <sub>2</sub> S/H <sub>2</sub> /He gasses)                  |                                       |    |            |             |       |        |         |               |
| 13                                                                                         | NiO<br>Ni <sub>3</sub> S <sub>2</sub> | O  | <b>5.5</b> | 2.1 ± 0.01  | 19.99 | 0.0151 | 1:44:31 | 423.2         |
|                                                                                            |                                       | S  | <b>2.3</b> | 2.2 ± 0.05  | 11.28 |        |         |               |
|                                                                                            |                                       | Ni | <b>2.3</b> | 2.55 ± 0.05 | 22.46 |        |         |               |
|                                                                                            |                                       | S  | <b>2.3</b> | 3.62 ± 0.06 | 13    |        |         |               |
| 14                                                                                         | NiO<br>Ni <sub>3</sub> S <sub>2</sub> | O  | 5.6 ± 0.4  | 2.04 ± 0.05 | 6     | 0.0133 | 1:47:08 | 424.1         |
|                                                                                            |                                       | S  | <b>2.8</b> | 2.07 ± 0.18 | 13.65 |        |         |               |
|                                                                                            |                                       | Ni | <b>2.8</b> | 2.58 ± 0.08 | 20.99 |        |         |               |
|                                                                                            |                                       | S  | <b>2.8</b> | 3.66 ± 0.01 | 17.34 |        |         |               |

... continued

|    |                           |               |                                                                                          |                 |                 |        |         |               |  |
|----|---------------------------|---------------|------------------------------------------------------------------------------------------|-----------------|-----------------|--------|---------|---------------|--|
| 15 | NiO<br>Ni-Bare            | O             | $(\Delta k = 3.5 - 11 \text{ \AA}^{-1}, \text{H}_2\text{S}/\text{H}_2/\text{He gasses})$ |                 |                 | 0.0235 | 1:49:45 | 424.7         |  |
|    |                           | S             | <b>2</b>                                                                                 | $2.01 \pm 0.08$ | 15.58           |        |         |               |  |
|    |                           | Mo            | <b>1.6</b>                                                                               | $2.22 \pm 0.03$ | 6.55            |        |         |               |  |
|    |                           | S             | <b>0.8</b>                                                                               | $2.83 \pm 0.08$ | 12.92           |        |         |               |  |
|    |                           | S             | <b>0.8</b>                                                                               | $3.55 \pm 0.0$  | 3.78            |        |         |               |  |
| 16 | NiO<br>Ni-Bare            | O             | $(\Delta k = 3 - 10 \text{ \AA}^{-1}, \text{H}_2\text{S}/\text{H}_2/\text{He gasses})$   |                 |                 | 0.0199 | 1:52:21 | 425 - 425.2   |  |
|    |                           | S             | <b>1</b>                                                                                 | $2.01 \pm 0.08$ | 7.91            |        |         |               |  |
|    |                           | Mo            | <b>2.4</b>                                                                               | $2.21 \pm 0.03$ | 0.74            |        |         |               |  |
|    |                           | S             | <b>1.2</b>                                                                               | $2.80 \pm 0.05$ | 11.96           |        |         |               |  |
|    |                           | S             | <b>1.2</b>                                                                               | $3.53 \pm 0.02$ | 15.60           |        |         |               |  |
| 17 | NiO<br>Ni-Bare            | O             | $(\Delta k = 3.5 - 12 \text{ \AA}^{-1}, \text{H}_2\text{S}/\text{H}_2/\text{He gasses})$ |                 |                 | 0.0185 | 1:57:35 | 425.3         |  |
|    |                           | S             | <b>1</b>                                                                                 | $2.0 \pm 0.09$  | 19.30           |        |         |               |  |
|    |                           | Mo            | <b>2.6</b>                                                                               | $2.20 \pm 0.01$ | 9.99            |        |         |               |  |
|    |                           | S             | <b>1.3</b>                                                                               | $2.76 \pm 0.01$ | 11.12           |        |         |               |  |
|    |                           | S             | <b>1.3</b>                                                                               | $3.48 \pm 0.07$ | 10.06           |        |         |               |  |
| 18 | NiMoS<br>( $\bar{1}010$ ) | S             | $(\Delta k = 3.7 - 11 \text{ \AA}^{-1}, \text{H}_2\text{S}/\text{H}_2/\text{He gasses})$ |                 |                 | 0.0094 | 2:00:12 | 425.4 - 426.3 |  |
|    |                           | Mo            | $3.2 \pm 0.4$                                                                            | $2.19 \pm 0.15$ | 10.63           |        |         |               |  |
|    |                           | Mo            | $1.1 \pm 0.1$                                                                            | $2.74 \pm 0.06$ | 6.88            |        |         |               |  |
|    |                           | S             | $1.1 \pm 0.1$                                                                            | $2.93 \pm 0.07$ | 7.62            |        |         |               |  |
|    |                           | S             | $2.1 \pm 0.3$                                                                            | $3.53 \pm 0.12$ | 9.66            |        |         |               |  |
| 19 | NiMoS<br>( $\bar{1}010$ ) | S             | $(\Delta k = 3.4 - 11 \text{ \AA}^{-1}, \text{H}_2\text{S}/\text{H}_2/\text{He gasses})$ |                 |                 | 0.0163 | 2:12:18 | 426.1 - 426.6 |  |
|    |                           | Mo            | $2.7 \pm 0.4$                                                                            | $2.19 \pm 0.15$ | 8.16            |        |         |               |  |
|    |                           | Mo            | $0.9 \pm 0.1$                                                                            | $2.76 \pm 0.04$ | 5.34            |        |         |               |  |
|    |                           | S             | $0.9 \pm 0.1$                                                                            | $2.94 \pm 0.06$ | 6.93            |        |         |               |  |
|    |                           | S             | $1.8 \pm 0.2$                                                                            | $3.52 \pm 0.12$ | 8.60            |        |         |               |  |
| 20 | Ni-Bare                   | S             | <b>Stage 6</b> ( $\Delta k = 3 - 11 \text{ \AA}^{-1}, \text{He gas}$ )                   |                 |                 | 0.0129 | 2:38:04 | 199.6 - 427.2 |  |
|    |                           | Mo            | $2.4 \pm 0.3$                                                                            | $2.2 \pm 0.01$  | 6.62            |        |         |               |  |
|    |                           | Ni            | $1.2 \pm 0.1$                                                                            | $2.76 \pm 0.01$ | 9.03            |        |         |               |  |
|    |                           | S             | $1.2 \pm 0.1$                                                                            | $3.14 \pm 0.01$ | 8.45            |        |         |               |  |
|    |                           |               | S                                                                                        | $1.2 \pm 0.1$   | $3.52 \pm 0.03$ | 1.16   |         |               |  |
|    | NiMoS<br>( $\bar{1}010$ ) | S             | $2.7 \pm 0.3$                                                                            | $2.2 \pm 0.16$  | 7.33            | 0.0102 |         |               |  |
|    |                           | Mo            | $0.9 \pm 0.1$                                                                            | $2.78 \pm 0.02$ | 4.30            |        |         |               |  |
|    |                           | Mo            | $0.9 \pm 0.1$                                                                            | $2.96 \pm 0.04$ | 4.43            |        |         |               |  |
| S  |                           | $1.8 \pm 0.2$ | $3.52 \pm 0.12$                                                                          | 5.91            |                 |        |         |               |  |
| 21 | Ni-Bare                   | S             | $(\Delta k = 3.5 - 11 \text{ \AA}^{-1}, \text{H}_2\text{S}/\text{H}_2/\text{He gasses})$ |                 |                 | 0.0146 | 2:57:39 | 86.2 - 188.7  |  |
|    |                           | Mo            | $2.7 \pm 0.3$                                                                            | $2.2 \pm 0.02$  | 5.88            |        |         |               |  |
|    |                           | Ni            | $1.3 \pm 0.2$                                                                            | $2.76 \pm 0.0$  | 7.87            |        |         |               |  |
|    |                           | S             | $1.3 \pm 0.2$                                                                            | $3.12 \pm 0.03$ | 7.77            |        |         |               |  |
|    |                           |               | S                                                                                        | $1.3 \pm 0.2$   | $3.51 \pm 0.04$ | 0.91   |         |               |  |
|    | NiMoS<br>( $\bar{1}010$ ) | S             | $3.0 \pm 0.3$                                                                            | $2.21 \pm 0.06$ | 6.64            | 0.0153 |         |               |  |
|    |                           | Mo            | $1.0 \pm 0.1$                                                                            | $2.76 \pm 0.04$ | 3.07            |        |         |               |  |
|    |                           | Mo            | $1.0 \pm 0.1$                                                                            | $2.95 \pm 0.06$ | 3.35            |        |         |               |  |
| S  |                           | $2.0 \pm 0.2$ | $3.51 \pm 0.13$                                                                          | 5.51            |                 |        |         |               |  |
| 22 | Ni-Bare                   | S             | $(\Delta k = 3.5 - 11 \text{ \AA}^{-1}, \text{H}_2\text{S}/\text{H}_2/\text{He gasses})$ |                 |                 | 0.0175 | 3:17:14 | 42 - 81.2     |  |
|    |                           | Mo            | $2.7 \pm 0.4$                                                                            | $2.21 \pm 0.02$ | 5.64            |        |         |               |  |
|    |                           | Ni            | $1.4 \pm 0.2$                                                                            | $2.75 \pm 0.0$  | 7.47            |        |         |               |  |
|    |                           | S             | $1.4 \pm 0.2$                                                                            | $3.12 \pm 0.03$ | 8.13            |        |         |               |  |
|    |                           |               | S                                                                                        | $1.4 \pm 0.2$   | $3.51 \pm 0.04$ | 0.97   |         |               |  |
|    | NiMoS<br>( $\bar{1}010$ ) | S             | $3.0 \pm 0.4$                                                                            | $2.21 \pm 0.17$ | 6.18            | 0.0185 |         |               |  |
|    |                           | Mo            | $1.0 \pm 0.1$                                                                            | $2.76 \pm 0.04$ | 2.87            |        |         |               |  |
|    |                           | Mo            | $1.0 \pm 0.1$                                                                            | $2.94 \pm 0.06$ | 3.61            |        |         |               |  |
| S  |                           | $2.0 \pm 0.2$ | $3.51 \pm 0.13$                                                                          | 5.08            |                 |        |         |               |  |

... continued

|    |                 |    |               |                 |      |        |         |             |
|----|-----------------|----|---------------|-----------------|------|--------|---------|-------------|
| 23 | Ni-Bare         | S  | $2.8 \pm 0.4$ | $2.21 \pm 0.02$ | 5.5  | 0.0177 | 3:43:13 | 29.6 - 40.4 |
|    |                 | Mo | $1.4 \pm 0.2$ | $2.75 \pm 0.0$  | 7.36 |        |         |             |
|    |                 | Ni | $1.4 \pm 0.2$ | $3.12 \pm 0.03$ | 7.8  |        |         |             |
|    |                 | S  | $1.4 \pm 0.2$ | $3.51 \pm 0.04$ | 0.61 |        |         |             |
|    | NiMoS<br>(1010) | S  | $3.0 \pm 0.3$ | $2.22 \pm 0.17$ | 5.79 | 0.0155 |         |             |
|    |                 | Mo | $1.0 \pm 0.1$ | $2.76 \pm 0.04$ | 2.86 |        |         |             |
|    |                 | Ni | $1.0 \pm 0.1$ | $2.94 \pm 0.06$ | 3.53 |        |         |             |
|    |                 | S  | $2.0 \pm 0.2$ | $3.52 \pm 0.13$ | 4.88 |        |         |             |

At stage 6, Hamilton test (ref. 58) was applied by imposing k- and R-ranges on the same values in order to fit two different models on the same EXAFS data independently and both of them give almost similar results (same fitting parameters)

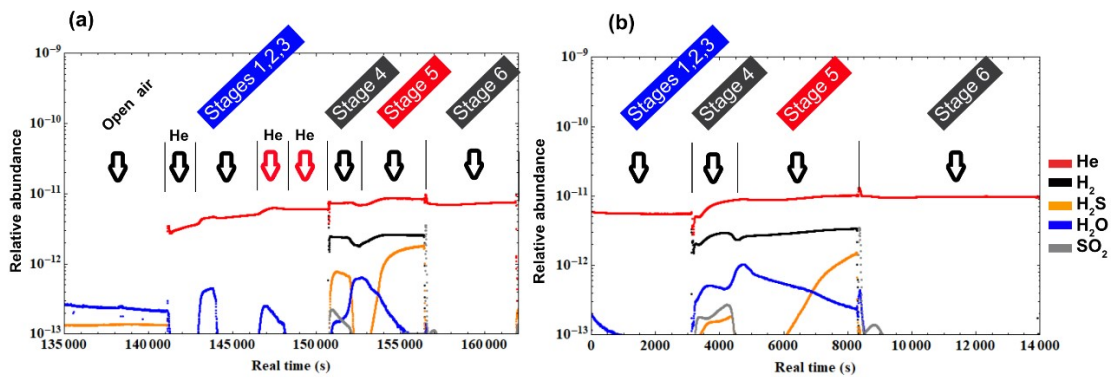

Figure 1S: Distribution profile of gas products ( $\text{H}_2\text{O}$ ,  $\text{SO}_2$ ) and inputs ( $\text{He}$ ,  $\text{H}_2$ ,  $\text{H}_2\text{S}$ ) during *in situ* (a) Mo and (b) Ni K-edge XAS measurement using MS

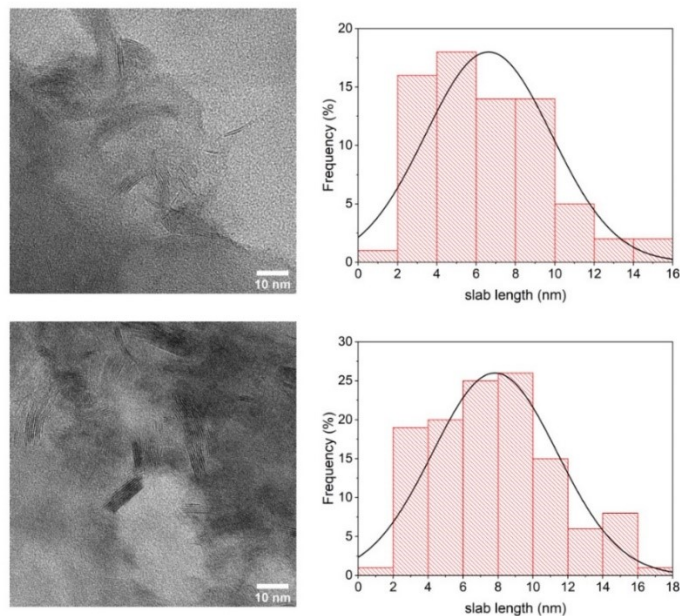



Figure 2S: HRTEM images (left) at two different locations and their respective slab length distributions (right) of sulfided NiMoS<sub>2</sub>/Al-PILC catalyst.

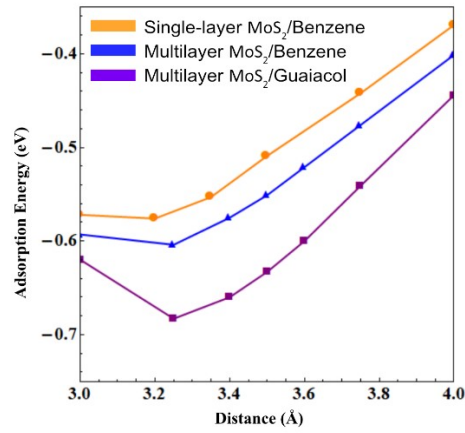

Figure 3S: Benzene and guaiacol adsorption on the basal plane of MoS<sub>2</sub> in planar configuration. The distance is from the center of mass of benzene and guaiacol to the z position of the top sulfur layer

Table 3S: Calculated vibrational frequencies (cm<sup>-1</sup>) of guaiacol adsorbed on several NiMoS<sub>2</sub> sites

|                                                | Mo-Bare    | Ni-Bare             | Mo-S50                 | NiMoS<br>(1010)     | Horiz-<br>basal        | Vert-basal             | INS<br>(ref. 25) |
|------------------------------------------------|------------|---------------------|------------------------|---------------------|------------------------|------------------------|------------------|
| $\nu(\text{C-C})$                              | 1512       | 1499, 1579,<br>1601 | 1499,<br>1578,<br>1620 | 1469, 1590,<br>1615 | 1512,<br>1593,<br>1608 | 1505,<br>1593,<br>1612 | -                |
| $\gamma(\text{CH}_3)$                          | 1459       | 1451, 1458          | 1450,<br>1458          | 1455                | -                      | 1461                   | 1463             |
| $\nu(\text{C-C}) + \gamma(\text{CH}_3)$        | 1443, 1450 | 1446                | 1449                   | 1448                | 1446,<br>1459          | 1452                   | -                |
| $\gamma(\text{CH}_3)$                          | -          | -                   | -                      | -                   | 1439                   | 1447                   | -                |
| $\delta(\text{CH}_3)$                          | -          | 1434                | 1436                   | 1425, 1435          | 1429                   | 1430                   | -                |
| $\nu(\text{C-C}) + \delta(\text{COH})$         | 1415, 1423 | -                   | -                      | -                   | -                      | -                      | -                |
| $\nu(\text{C-C})$                              | 1335, 1366 | 1362                | 1368                   | 1366                | 1397                   | 1390                   | 1378             |
| $\delta(\text{C-H})$                           | 1263       | 1290                | 1293                   | 1296                | 1295                   | 1297                   | -                |
| $\nu(\text{C-OH}) + \nu(\text{C-OCH}_3)$       | -          | -                   | -                      | -                   | 1272                   | 1236,<br>1273          | -                |
| $\nu(\text{C-OCH}_3)$                          | 1205       | 1266                | 1270                   | -                   | 1243                   | -                      | -                |
| $\nu(\text{C-OH})$                             | 1187       | 1221                | 1191                   | 1251                | -                      | -                      | -                |
| $\nu(\text{C-OCH}_3)$                          | -          | -                   | -                      | 1205                | -                      | -                      | -                |
| $\delta(\text{CH}_3)$                          | 1174       | 1180                | 1180                   | 1173                | 1179                   | 1184                   | -                |
| $\delta(\text{C-H})$                           | -          | 1169                | 1169                   | 1168                | 1167                   | 1164                   | 1164             |
| $\delta(\text{CCC})$ ip                        | -          | 1156                | 1159                   | 1157                | 1154                   | -                      | -                |
| $\nu(\text{C-OH})$                             | -          | -                   | 1148                   | -                   | -                      | -                      | -                |
| $\delta(\text{O-CH}_3)$                        | 1143       | 1142                | 1140                   | 1142                | 1139                   | 1142                   | 1043             |
| $\delta(\text{CCC})$ ip                        | 1140       | -                   | -                      | 1102                | 1101                   | 1100                   | -                |
| $\nu(\text{C-OH})$                             | 1089       | 1096                | 1085                   | -                   | -                      | -                      | -                |
| $\delta(\text{CCC})$ ip                        | 990, 1033  | 1055                | 1059                   | 1050                | 1055                   | 1069                   | -                |
| $\delta(\text{CCC})$ ip + $\nu(\text{O-CH}_3)$ | 983        | 1028                | 1025                   | 1009                | 1041                   | 1042                   | -                |
| $\tau(\text{C-H})$                             | -          | -                   | -                      | -                   | -                      | 953                    | -                |
| $\delta(\text{CCC})$ oop                       | 826, 898   | 833, 918,           | 827, 912,              | 830, 913,           | 895, 947               | 894                    | 846,             |

|                                       |                  |     |          |     |     |     |          |
|---------------------------------------|------------------|-----|----------|-----|-----|-----|----------|
|                                       |                  | 965 | 965      | 963 |     |     | 926, 963 |
| $\delta(\text{CCC})$ ip               | -                | 891 | -        | 824 | 832 | 830 | -        |
| $\delta(\text{CCC})$ oop              | -                | -   | -        | -   | 821 | 816 | -        |
| $\delta(\text{CCC})$ ip               | 787, 788         | 751 | 750, 814 | 771 | 764 | 765 | 752      |
| $\delta(\text{C-H})$                  | -                | 748 | 741      | 742 | 745 | 746 | -        |
| $\delta(\text{CCC})$ oop              | 747              | 713 | -        | -   | 721 | 718 | -        |
| $\delta(\text{CCC})$ ip               | 728              | -   | -        | -   | -   | -   | -        |
| $\delta(\text{C-OH})$                 | 692              | -   | 676      | -   | -   | -   | -        |
| $\delta(\text{CCC})$ oop              | 611              | -   | -        | -   | 583 | -   | -        |
| $\delta(\text{CCC})$ ip               | 557              | 574 | 581      | 600 | -   | 584 | 557      |
| $\delta(\text{CCC})$ oop              | -                | 559 | 558      | 558 | 570 | 571 | -        |
| $\delta(\text{C-OH})$                 | -                | 548 | -        | -   | -   | -   | -        |
| $\rho(\text{C-O})$                    | -                | -   | 532      | 538 | 524 | 524 | 536      |
| $\delta(\text{CCC})$ ip               | 471, 476,<br>516 | 492 | 503      | 508 | 498 | 492 | 495      |
| $\delta(\text{CCC})$ oop              | -                | 461 | 468      | 447 | 471 | 467 | 461      |
| $\delta(\text{C-OH})$                 | -                | -   | -        | 437 | -   | -   | -        |
| $\gamma(\text{C-O})$                  | -                | -   | -        | 412 | -   | -   | -        |
| $\delta(\text{CCC})$ oop              | 403              | -   | -        | -   | -   | -   | -        |
| $\delta(\text{C-OH})$                 | -                | -   | -        | -   | 382 | 370 | -        |
| $\nu(\text{Mo-O}) + \nu(\text{Mo-C})$ | 356              | -   | -        | -   | -   | -   | -        |
| $\gamma(\text{C-O})$                  | -                | 334 | 361      | -   | 350 | 337 | -        |
| $\delta(\text{CCC})$ oop              | 302, 333         | 323 | 344      | 314 | 317 | 319 | 314, 346 |
| $\tau(\text{O-CH}_3)$                 | -                | 271 | 268      | -   | -   | 266 | -        |
| $\gamma(\text{C-O})$                  | -                | -   | 258      | 268 | -   | -   | -        |
| $\nu(\text{Mo-O})$                    | 254              | -   | -        | -   | -   | -   | -        |
| $\tau(\text{O-CH}_3)$                 | 234              | -   | -        | 243 | 249 | -   | 252      |
| $\gamma(\text{C-O})$                  | 227              | 231 | -        | -   | 233 | 227 | -        |
| $\tau(\text{O-CH}_3)$                 | -                | -   | 221      | -   | -   | -   | -        |
| $\tau(\text{C-O})$                    | -                | 211 | -        | 206 | 195 | 192 | 206      |
| $\delta(\text{O-CH}_3)$               | 173              | -   | -        | 190 | 169 | 126 | -        |
| $\delta(\text{CCC})$ oop              | 137              | 138 | 149      | -   | -   | -   | 147      |

$\nu$ ---stretching,  $\delta$ ---bending,  $\gamma$ ---scissoring,  $\omega$ ---wagging,  $\tau$ ---twisting, torsion,  $\rho$ ---rocking, oop---out-of-plane, ip---in-plane. Vibrational mode descriptions obtained using animations in Chemcraft.
